# Supplementary material
Source: publisher figshare collection journal article supplement (https://tandf.figshare.com/articles/dataset/_/10005953)
Supplement: Supplementary file 1 [file 1]

## Electronic Supplementary Material

**Journal:** Plant Ecology & Diversity

**Manuscript:** High plant taxonomic beta diversity and functional and phylogenetic convergence between two Neotropical inselbergs

**Authors:** de Paula et al.

**Table S1.** Correlation matrix between inselbergs and the measured environmental parameters (patch area, soil depth and slope).

|            | Inselberg | Patch area | Soil depth | Slope  |
|------------|-----------|------------|------------|--------|
| Inselberg  | 1         | 0.023      | 0.148      | -0.151 |
| Patch area | 0.023     | 1          | 0.569      | 0.305  |
| Soil depth | 0.148     | 0.569      | 1          | 0.042  |
| Slope      | -0.151    | 0.305      | 0.042      | 1      |
