# Supplementary material
Source: publisher figshare collection journal article supplement (https://tandf.figshare.com/articles/dataset/_/10005953)

## Electronic Supplementary Material

**Journal:** Plant Ecology & Diversity

**Manuscript:** High plant taxonomic beta diversity and functional and phylogenetic convergence between two Neotropical inselbergs

**Authors:** de Paula et al.

**Figure S1.** Rarefaction curves for TD, FD and PD as a function of cumulative number of patches. The red curve represents the coastal inselberg in Rio de Janeiro and the blue curve represents the inland inselberg in Minas Gerais.

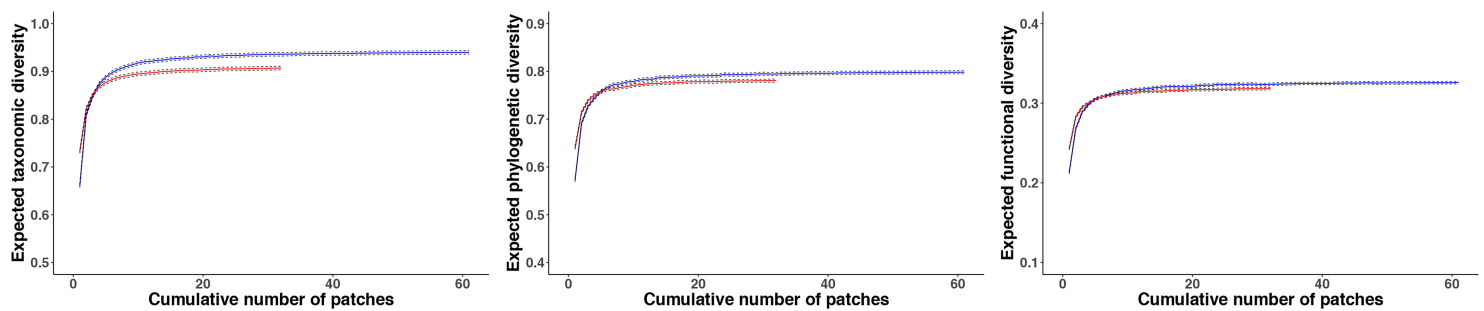

Supplement: Supplementary file 2 [file 1]
