# Supplementary material
Source: publisher figshare collection journal article supplement (https://tandf.figshare.com/articles/dataset/_/10005953)
Supplement: Supplementary file 3 [file 1]

Archive with 2 entries (2 files):
- tped_a_1673846_sm4505.pdf
- tped_a_1673846_sm4504.pdf
